# 1 Direct RNA sequencing and early evolution 2 of SARS-CoV-2

3 George Taiaroa<sup>1,2</sup>, Daniel Rawlinson<sup>1</sup>, Leo Featherstone<sup>1</sup>, Miranda Pitt<sup>1</sup>, Leon Caly<sup>2</sup>,  
4 Julian Druce<sup>2</sup>, Damian Purcell<sup>1</sup>, Leigh Harty<sup>1</sup>, Thomas Tran<sup>2</sup>, Jason Roberts<sup>2</sup>, Nichollas  
5 Scott<sup>1</sup>, Mike Catton<sup>2</sup>, Deborah Williamson<sup>1,3</sup>, Lachlan Coin<sup>1</sup>, Sebastian Duchene<sup>1</sup>\*

6

7 1. Department of Microbiology and Immunology, University of Melbourne at The Peter  
8 Doherty Institute for Infection and Immunity, Melbourne, Australia

9 2. Victorian Infectious Diseases Reference Laboratory, Royal Melbourne Hospital, at  
10 the Peter Doherty Institute for Infection and Immunity, Victoria, Australia.

11 3. Department of Microbiology, Royal Melbourne Hospital, Victoria, Australia

12 • These authors contributed equally to the work

13

14 Corresponding author:

15

16 George Taiaroa, The Peter Doherty Institute for Infection and Immunity, University of  
17 Melbourne and Victorian Infectious Diseases Reference Laboratory, Melbourne,  
18 Australia Tel: +61 (0)3 8344 5466. Email: [george.taiaroa@unimelb.edu.au](mailto:george.taiaroa@unimelb.edu.au)

19

20 Abstract - Fundamental aspects of SARS-CoV-2 biology remain to be described, having the  
21 potential to provide insight to the response effort for this high-priority pathogen. Here we  
22 describe the first native RNA sequence of SARS-CoV-2, detailing the coronaviral  
23 transcriptome and epitranscriptome, and share these data publicly. A data-driven inference  
24 of viral genetic features and evolutionary rate is also made. The rapid sharing of sequence  
25 information throughout the SARS-CoV-2 pandemic represents an inflection point for public  
26 health and genomic epidemiology, providing early insights into the biology and evolution of  
27 this emerging pathogen.

28

29

30 The pandemic of severe acute respiratory syndrome 2 (SARS-CoV-2), causing the disease  
31 COVID-19 and originating in Wuhan, China, has spread to more than 200 countries and  
32 territories, and has caused more than 1,000,000 cases globally [1-4]. SARS-CoV-2 is a  
33 positive-sense single-stranded RNA ((+)ssRNA) virus, belonging to the *Coronaviridae* family  
34 and *betacoronavirus* genus [5]. Related betacoronaviruses are capable of infection and

35 ongoing transmission in mammalian and avian hosts, resulting in illness in humans such as  
36 Middle East respiratory syndrome (MERS) and the original severe acute respiratory  
37 syndrome (SARS) as examples [6-7]. Based on the limited sampling of potential reservoir  
38 species, SARS-CoV-2 has been found to be most similar to bat betacoronaviruses on a  
39 genomic level, potentially indicating that bats are a natural reservoir [5,8].

40

41 The genome sequence of SARS-CoV-2 was rapidly determined and shared on January 5<sup>th</sup>  
42 of 2020, being 29,903 nucleotides in length, and annotated based on sequence similarity to  
43 other coronaviruses (GenBank: MN908947.3). As the emergence of SARS-CoV-2 has  
44 escalated, genomic analyses have played a key role in public health responses, including in  
45 the design of appropriate molecular diagnostics and supporting epidemiological efforts to  
46 track and contain the outbreak [9,10]. Taken together, publicly available sequence data  
47 suggest a recently occurring, point-source outbreak, as described in online sources [10-12].

48

49 Aspects of the response assume that the biology of SARS-CoV-2 is comparable with  
50 previously characterised coronaviruses, including the annotation of genes and the estimation  
51 of molecular evolutionary rates [11-12]. It remains highly relevant to determine these  
52 features experimentally with SARS-CoV-2-specific data, potentially revealing other insights  
53 into the biology of this emergent pathogen. To address this, here we describe (i) the first  
54 native RNA sequence of SARS-CoV-2, detailing the coronaviral transcriptome and  
55 epitranscriptome, and (ii) estimates of coronaviral evolutionary rates and related timescales,  
56 based on data available at this stage of the outbreak.

57

58 Characterised coronaviruses have some of the largest genomes among RNA viruses, and  
59 express their genetic content as a nested set of polyadenylated mRNA transcripts (Figure 1),  
60 with lengths corresponding to each encoded open reading frame (ORF). These include two  
61 large ORFs, ORF1a and ORF1ab, encoded by the complete viral genome and expressed  
62 upon cell entry. Other subgenomic mRNAs are generated through a mechanism termed  
63 discontinuous extension of minus strands, encoding structural proteins (spike protein (S),  
64 envelope protein (E), membrane protein (M) and nucleocapsid protein (N)) and accessory  
65 proteins (3a, 6, 7a, 7b, 8 and 10). The subgenomic mRNAs have a common 5' leader  
66 sequence, near-identical to that located in the 5'-UTR of the viral genome; the transcription  
67 mechanism repositions the 5' leader sequence upstream of ORFs, with each translation  
68 start site being located at the primary position for ribosome scanning. These ORFs, although  
69 annotated, are yet to be shown as expressed experimentally. Standard sequencing

70 technologies are unable to produce reads representing (i) complete RNA viral genomes or  
71 (ii) subgenomic mRNAs needed to verify annotated ORFs, as these methods generate short  
72 reads and have a reliance on amplification to generate complementary DNA (cDNA)  
73 sequences.

74

75 To define the architecture of the coronaviral transcriptome, a recently established direct RNA  
76 sequencing approach was applied, using a highly parallel array of nanopores [16]. In brief,  
77 nucleic acids were prepared from cell culture material with high levels of SARS-CoV-2  
78 growth, this being expected to include examples of both genomic mRNA and transcripts  
79 corresponding to each ORF. These were sequenced with Oxford Nanopore Technologies,  
80 including poly(T) adaptors and an R9.4 flowcell on a GridION platform (Oxford Nanopore  
81 Technologies). Through this approach, the electronic current is measured as individual  
82 strands of RNA translocate through a nanopore, with derived signal-space data basecalled  
83 to infer the corresponding nucleobases. As a comparator, virion material of SARS-CoV-2  
84 was also prepared and sequenced through this approach, with complete viral genome  
85 sequences expected to predominate rather than subgenomic transcripts.

86

87 The cellular-derived material was used to generate 680,347 reads, comprising 860Mb of  
88 sequence information (BioProject PRJNA608224). Aligning to the genome of the cultured  
89 SARS-CoV-2 isolate (MT007544.1), a subset of reads were attributed to coronavirus  
90 sequences (28.9%), comprising 367Mb of sequence distributed across the 29,893 base  
91 genome. Of these, a number had lengths >20,000 bases, capturing the majority of the  
92 SARS-CoV-2 genome on a single molecule. This direct RNA sequencing approach  
93 generated an average 12,230 fold coverage of the coronaviral genome, biased towards  
94 sequences proximal to the polyadenylated 3' tail; coverage ranged from 34 fold to >160,000  
95 fold (Figure 1B), reflecting the higher abundance of subgenomic mRNAs carrying these  
96 sequences, as well as the directional sequencing from the polyadenylated 3' tail. The virion  
97 material generated fewer reads, and included a calibration standard added during library  
98 preparation (430,923 reads, BioProject PRJNA608224).

99

100 Many features of SARS-CoV-2 biology are captured in these direct RNA sequence data,  
101 including the transcriptome, as well as RNA base modifications or 'epitranscriptome'. To  
102 define the transcriptome, the shared 5' leader sequence was used as a marker to identify  
103 intact transcripts, these corresponding to subgenomic mRNAs and having a low abundance  
104 in the virion-derived data (Supplementary Figures 1 and 2). In SARS-CoV-2, we identify

105 eight major viral mRNAs in addition to the viral genome; each annotated gene was observed  
106 as a distinct subgenomic mRNA, outside of ORF7b and ORF10 (Figure 1C, Supplementary  
107 Table 1). In SARS, ORF7a and ORF7b are encoded on a shared subgenomic mRNA, with  
108 translation of ORF7b being achieved through ribosome leaky scanning, explaining the  
109 absence of a dedicated ORF7b-encoding subgenomic mRNA [17]. There is however no  
110 satisfactory explanation for the absence of an ORF10-encoding subgenomic mRNA.

111

112 ORF10 is the last predicted coding sequence upstream of the poly-A sequence, and the  
113 shortest of the predicted coding sequences at 117 bases in length. ORF10 also has no  
114 annotated function, and the putative encoded peptide does not appear in SARS-CoV-2  
115 proteomes [18,19] or have a homolog in the SARS-CoV-1 proteome (Proteome ID:  
116 UP000000354 [20]). Subgenomic mRNAs corresponding to ORF10 are not identifiable in our  
117 reads (Supplementary Figure 3). These data suggest that the sequence currently annotated  
118 as ORF10 does not have a protein coding function in SARS-CoV-2. Ongoing molecular  
119 evolution at this locus should be considered in light of this finding.

120

121 Instead of encoding a protein sequence, the locus annotated as ORF10 immediately  
122 upstream of the 3' UTR may act itself or as a precursor of other RNAs in the regulation of  
123 gene expression, replication or modulating translation efficiency or cellular antiviral  
124 pathways; the 3' UTR of coronaviruses contains domains critical for regulating viral RNA  
125 synthesis and other aspects of viral biology [21]. An initial region of the 3' UTR appears  
126 essential for viral replication, and an area further 3' includes the stem-loop II-like motif (s2m)  
127 a feature conserved in SARS-CoV-2 and other coronaviruses [22,23], the s2m having a  
128 proposed role in recruiting host translational machinery [24]. A small number of cell culture-  
129 derived SARS-CoV-2 genomes carry a shared deletion at an area of the 3' UTR including an  
130 aspect of the s2m (Supplementary Figure 4), this parallel molecular evolution further  
131 suggesting the region may have functional roles *in vivo*.

132

133 An analysis of transcript breakpoints further illustrates the potential for 5' UTR positions  
134 outside of the canonical leader sequence to enable transcript production, with low-frequency  
135 non-canonical variations in mRNA splice co-ordinates (Figure 2, Supplementary Figures 5  
136 and 6). Low frequency variants may be generated during the preparation of nucleic acids for  
137 sequencing, with the rate of chimeric read formation being unknown; this could be explored  
138 through analysis of *in vitro* transcribed RNA control material.

139



140 In addition to RNA modifications such as the methylation of the 5' cap structure and  
141 polyadenylation of the 3' terminus needed for efficient translation of coding sequences, other  
142 RNA modifications may have functional roles in SARS-CoV-2 [25]. A range of modifications  
143 are identifiable using direct RNA sequence data [16,25]; our available SARS-CoV-2 direct  
144 RNA sequence data providing adequate coverage to confidently call specific modifications.  
145 Through analysis of signal-space data, we identified 42 positions with predicted 5-  
146 methylcytosine modifications, appearing at consistent positions between subgenomic  
147 mRNAs (Supplementary Figure 7, and Supplementary Table 2). In other positive ssRNA  
148 viruses, RNA methylation can change dynamically during the course of infection [26],  
149 influencing host-pathogen interaction and viral replication. Other modifications may become  
150 apparent once training datasets are available for direct RNA sequence data, with little known  
151 of the epitranscriptomic landscape of coronaviruses [25,27].

152

153 As well as investigating the above assumed features of SARS-CoV-2 genetics, sequence  
154 data also enable an estimate of the molecular evolutionary rate, with globally sourced  
155 genome sequences being shared and publicly available. Evolutionary rate estimates from  
156 other coronaviruses such as Middle East Respiratory Syndrome (MERS) are not necessarily  
157 applicable here, particularly because MERS had multiple independent introductions into  
158 humans [28-30]. To estimate the evolutionary rate and time of origin of the SARS-CoV-2  
159 outbreak, we carried out Bayesian phylogenetic analyses using a curated set of 122 high  
160 quality publicly available SARS-CoV-2 genome sequences, each having a known collection  
161 date (Figure 3, Supplementary Table 3). The sampling times were sufficient to calibrate a  
162 molecular clock and infer the evolutionary rate and timescale of the outbreak using a  
163 Bayesian approach; the evolutionary rate of SARS-CoV-2 was estimated to be  $1.20 \times 10^{-3}$   
164 substitutions/site/year (95% HPD  $8.91 \times 10^{-4}$  -  $1.52 \times 10^{-3}$ ), and the of time of origin to be late  
165 November 2019 (95% HPD August 2019, December 2019), which is in agreement with  
166 epidemiological evidence and other recent analyses (Figure 3A) [1-4, 31, 32].

167

168 A further set of 66 high quality genomes collected earlier in the outbreak (Supplementary  
169 Table 4), and maximal diversity data set from all data available in GISAID to March 28th to  
170 show the utility of capturing varying degrees of genetic diversity (Supplementary Table 5).  
171 This Bayesian approach demonstrated improved precision in estimates of evolutionary rates  
172 using our dataset with highest genetic diversity. This may be explained by the stochastic  
173 variation typical in data from early in an outbreak having a smaller impact as the virus  
174 accumulates genetic variation. These results are also supported by root-to-tip regression, a

175 visual assessment of the degree of clocklike evolution in the data (Supplementary Figures 8  
176 and 9). The evolutionary rate generated the high diversity set of 100 genomes was  $1.56 \times$   
177  $10^{-3}$  substitutions/site/year (95% HPD  $1.09 \times 10^{-3}$  -  $2.05 \times 10^{-3}$ ), whereas that based on 66  
178 genomes was  $1.16 \times 10^{-3}$  substitutions/site/year (95% HPD  $6.32 \times 10^{-4}$  -  $1.69 \times 10^{-3}$ ). Our  
179 estimate of the evolutionary rate of SARS-CoV-2 is in line with those of other coronaviruses  
180 (Figure 3B), and the low genomic diversity and recent timescale of the outbreak support a  
181 recently occurring, point-source transfer to humans.

182

183 Other phylodynamic inferences may soon become possible for SARS-CoV-2, as further  
184 genomic data becomes available and the sampling rate becomes more consistent. The  
185 current distribution of sampling times (Supplementary Figure 8) appears to be prohibitive to  
186 phylodynamic inference of the SARS-CoV-2 effective population size ( $N_e$ , not included here).  
187 Although a required threshold of genomes to allow such phylodynamic investigation may  
188 have been crossed, the temporal spread of these isolates may differ too much to satisfy  
189 constant sampling assumptions underlying many phylodynamic skyline approaches inferring  
190  $N_e$  over time. Again, as sampling continues a more consistent rate of sampling is likely to  
191 emerge, allowing such analyses.

192

193 Insights are provided on the molecular biology of SARS-CoV-2, revealed through the use of  
194 direct RNA sequence and publicly available data. The rapid sharing of these and other  
195 genetic data support the global response effort and represents an inflection point for  
196 communicable diseases and genomic epidemiology, with complete data shared openly and  
197 rapidly between academic and public health groups.

198

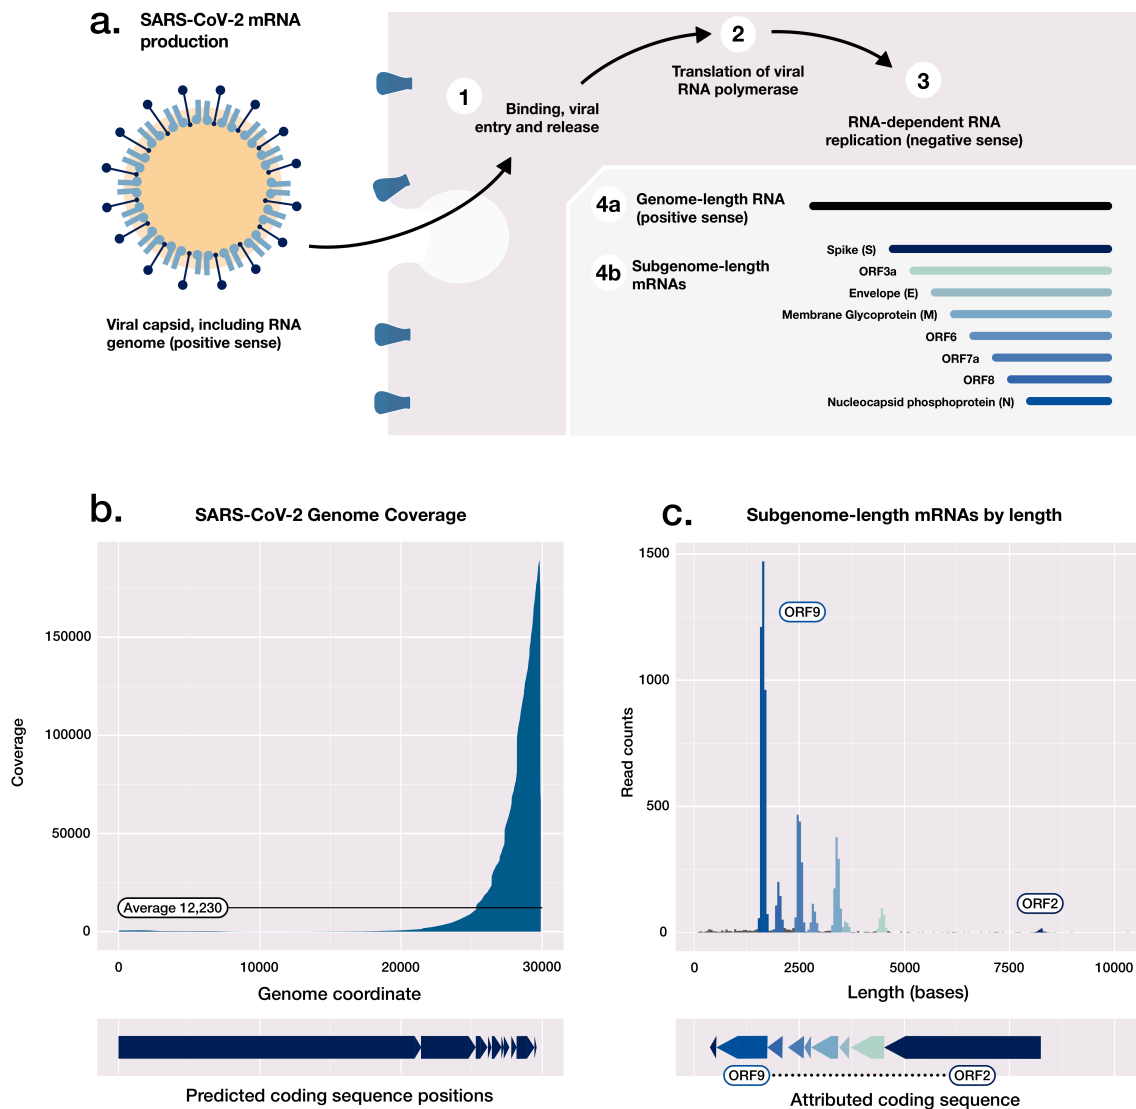

199

200 **Figure 1. SARS-CoV-2 genetics and transcriptome architecture.**

201 A) Schematic of the early stages of SARS-CoV-2 cell entry and transcript production,  
202 including *in vivo* synthesis of positive sense genome-length RNA molecules and subgenomic  
203 mRNAs. B) Read coverage of direct RNA reads from cell-culture material, aligned to the  
204 local SARS-CoV-2 genome (29,893 bases), showing a bias towards the 3' polyadenylated  
205 end. C) Read length histogram, showing subgenomic mRNAs attributed to coding  
206 sequences.

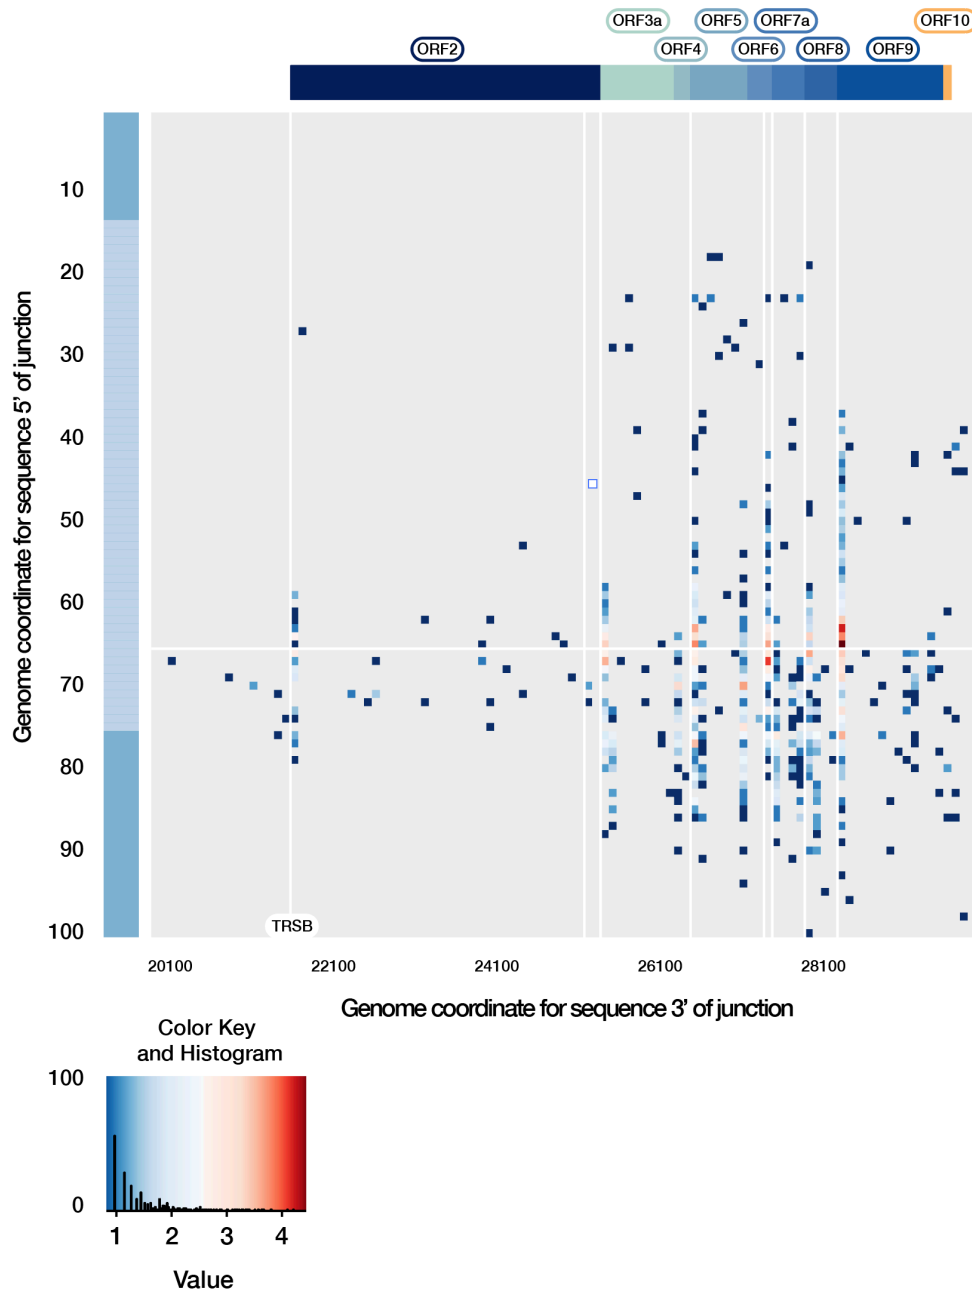

207

208 **Figure 2. Breakpoint analysis of the SARS-CoV-2 transcriptome.**

209 Direct RNA reads carrying a breakpoint relative to the 5' leader sequence are shown,  
210 representing potentially viable transcripts. These breakpoints are localised at the same  
211 position on the leader sequence (positions 62-68), and on the 3' to predicted transcription  
212 regulating sequences in the body of the genome (TRS-Bs, highlighted by vertical weight  
213 lines), generating common subgenomic mRNAs. Of note, many low frequency breakpoints  
214 are detected, although few near the sequence currently annotated as ORF10. The key  
215 shows the distribution of transcript breakpoints. Colour is matched to a 'value' measuring the  
216 number of reads with break points at that position, log<sub>10</sub>-scaled. The histogram component  
217 illustrates the number of transcripts with a given abundance value.

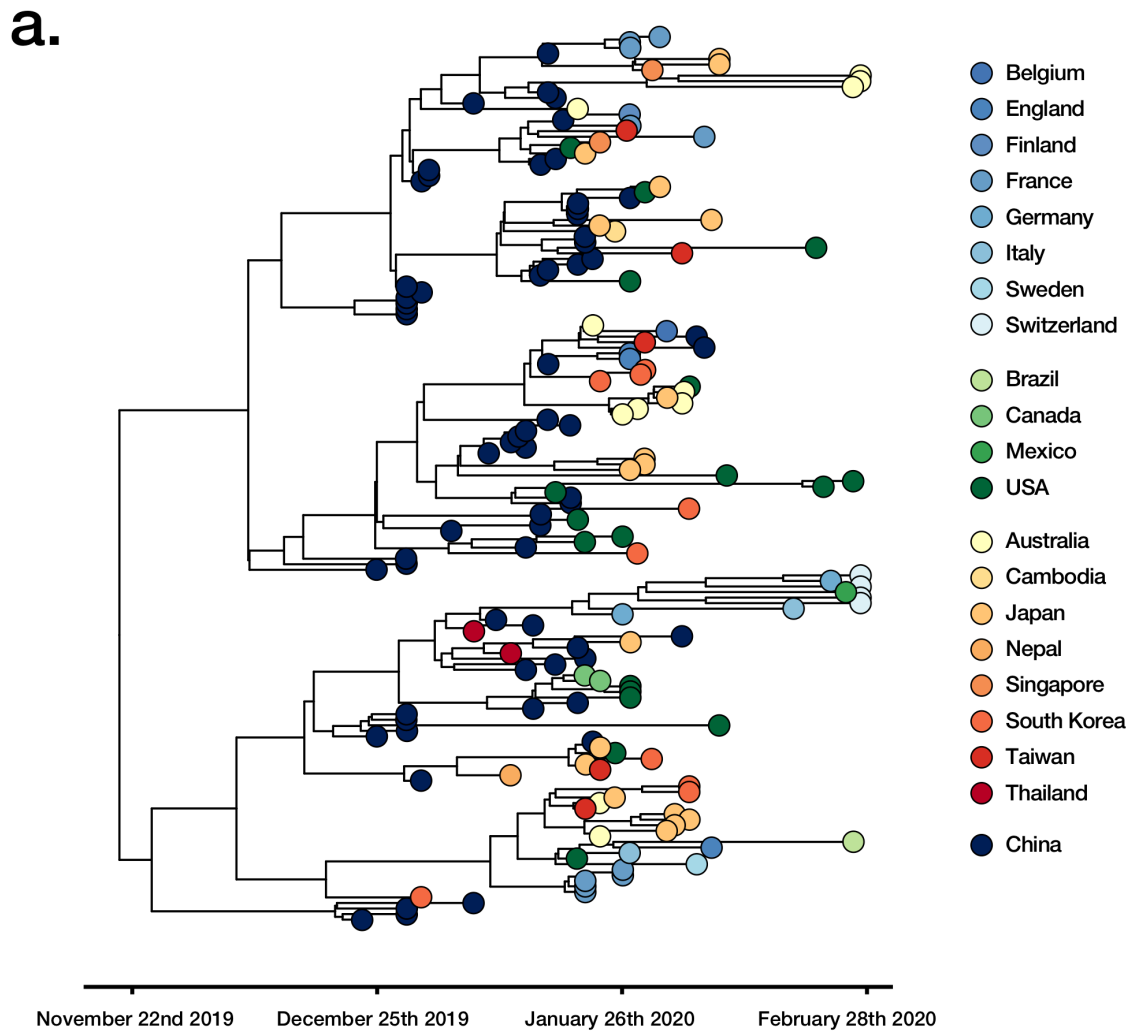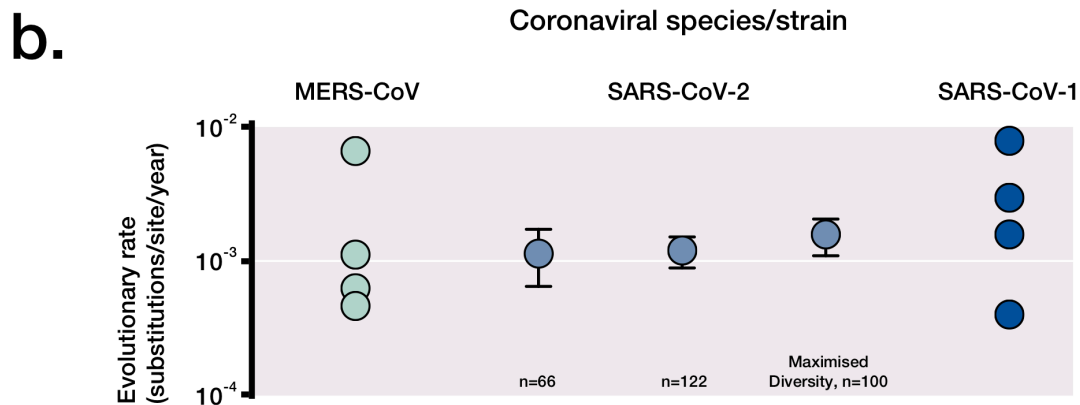

218  
219 **Figure 3. Assessment of viral evolutionary rate and outbreak timing with SARS-CoV-2-**  
220 **specific data.** A) A timed highest clade-credibility phylogenetic tree of curated SARS-CoV-2  
221 genomes as inferred in BEAST. B) Comparison of SARS-CoV-2 rate estimates with varying  
222 datasets, and previously published estimates of other coronaviruses.

223 References

224

225 [1] World Health Organization. Pneumonia of unknown cause — China. 2020  
226 ([https://www.who.int/csr/don/05-january-2020-pneumonia-of-unkown-cause-](https://www.who.int/csr/don/05-january-2020-pneumonia-of-unkown-cause-china/en/)  
227 [china/en/](https://www.who.int/csr/don/05-january-2020-pneumonia-of-unkown-cause-china/en/)).

228

229 [2] United Nations Development Programme – March 2020. UNDP support for  
230 coronavirus-affected countries goes beyond health.

231 [https://www.undp.org/content/undp/en/home/blog/2020/undp-support-for-](https://www.undp.org/content/undp/en/home/blog/2020/undp-support-for-coronavirus-affected-countries-goes-beyond-heal.html)  
232 [coronavirus-affected-countries-goes-beyond-heal.html](https://www.undp.org/content/undp/en/home/blog/2020/undp-support-for-coronavirus-affected-countries-goes-beyond-heal.html)

233

234 [3] Dong, Ensheng, Hongru Du, and Lauren Gardner. "An interactive web-based  
235 dashboard to track COVID-19 in real time." *The Lancet Infectious Diseases* (2020).  
236 DOI: 10.1016/S1473-3099(20)30120-1

237

238 [4] World Health Organization. Statement on the second meeting of the International  
239 Health Regulations (2005) Emergency Committee regarding the outbreak of novel  
240 coronavirus (2019-nCoV). January 30, 2020 ([https://www.who.int/news-](https://www.who.int/news-room/detail/30-01-2020-statement-on-the-second-meeting-of-the-international-health-regulations-(2005)-emergency-committee-regarding-the-outbreak-of-novel-coronavirus-(2019-ncov))  
241 [room/detail/30-01-2020-statement-on-the-second-meeting-of-the-international-](https://www.who.int/news-room/detail/30-01-2020-statement-on-the-second-meeting-of-the-international-health-regulations-(2005)-emergency-committee-regarding-the-outbreak-of-novel-coronavirus-(2019-ncov))  
242 [health-regulations-\(2005\)-emergency-committee-regarding-the-outbreak-of-novel-](https://www.who.int/news-room/detail/30-01-2020-statement-on-the-second-meeting-of-the-international-health-regulations-(2005)-emergency-committee-regarding-the-outbreak-of-novel-coronavirus-(2019-ncov))  
243 [coronavirus-\(2019-ncov\)](https://www.who.int/news-room/detail/30-01-2020-statement-on-the-second-meeting-of-the-international-health-regulations-(2005)-emergency-committee-regarding-the-outbreak-of-novel-coronavirus-(2019-ncov))).

244

245 [5] Lu, Roujian, et al. "Genomic characterisation and epidemiology of 2019 novel  
246 coronavirus: implications for virus origins and receptor binding." *The Lancet* (2020).  
247 DOI: 10.1016/S0140-6736(20)30251-8

248

249 [6] Peiris JS, Yuen KY, Osterhaus AD, Stöhr K. The severe acute respiratory syndrome.  
250 *New England Journal of Medicine*. 2003 Dec 18;349(25):2431-41. DOI:  
251 10.1056/NEJMra032498

252

253 [7] Assiri A, McGeer A, Perl TM, Price CS, Al Rabeeah AA, Cummings DA, Alabdullatif  
254 ZN, Assad M, Almulhim A, Makhdoom H, Madani H. Hospital outbreak of Middle East  
255 respiratory syndrome coronavirus. *New England Journal of Medicine*. 2013 Aug  
256 1;369(5):407-16. DOI: 10.1056/NEJMoa1306742

257



- 258 [8] Perlman, S. Another decade, another coronavirus. *New England Journal of Medicine*.  
259 2020 February 20; 382:760-762. DOI: 10.1056/NEJMe2001126  
260
- 261 [9] Shu Y, McCauley J. GISAID: Global initiative on sharing all influenza data—from  
262 vision to reality. *Eurosurveillance*. 2017 Mar 30;22(13). <https://www.gisaid.org/>  
263
- 264 [10] Hadfield J, Megill C, Bell SM, Huddleston J, Potter B, Callender C, Sagulenko P,  
265 Bedford T, Neher RA. Nextstrain: real-time tracking of pathogen evolution.  
266 *Bioinformatics*. 2018 Dec 1;34(23):4121-3. <https://nextstrain.org/ncov>  
267
- 268 [11] Andersen KG, Rambaut A, Lipkin WI, Holmes EC, Garry RF. The Proximal Origin of  
269 SARS-CoV-2. *Virological*, accessed on 27/02/2020. [http://virological.org/t/the-](http://virological.org/t/the-proximal-origin-of-sars-cov-2/398)  
270 [proximal-origin-of-sars-cov-2/398](http://virological.org/t/the-proximal-origin-of-sars-cov-2/398)  
271
- 272 [12] Rambaut A. Phylodynamic Analysis | 129 genomes | 24 Feb 2020. *Virological*,  
273 accessed 27/02/2020. [http://virological.org/t/phylodynamic-analysis-129-genomes-](http://virological.org/t/phylodynamic-analysis-129-genomes-24-feb-2020/356)  
274 [24-feb-2020/356](http://virological.org/t/phylodynamic-analysis-129-genomes-24-feb-2020/356)  
275
- 276 [13] Yount B, Curtis KM, Fritz EA, Hensley LE, Jahrling PB, Prentice E, Denison MR,  
277 Geisbert TW, Baric RS. Reverse genetics with a full-length infectious cDNA of severe  
278 acute respiratory syndrome coronavirus. *Proceedings of the National Academy of*  
279 *Sciences*. 2003 Oct 28;100(22):12995-3000. DOI: 10.1073/pnas.1735582100  
280
- 281 [14] Brian DA, Baric RS. Coronavirus genome structure and replication. In *Coronavirus*  
282 *replication and reverse genetics 2005* (pp. 1-30). Springer, Berlin, Heidelberg.  
283
- 284 [15] Chen Y, Cai H, Xiang N, Tien P, Ahola T, Guo D. Functional screen reveals SARS  
285 coronavirus nonstructural protein nsp14 as a novel cap N7 methyltransferase.  
286 *Proceedings of the National Academy of Sciences*. 2009 Mar 3;106(9):3484-9. DOI:  
287 10.1073/pnas.0808790106  
288
- 289 [16] Galalde DR, Snell EA, Jachimowicz D, Sipos B, Lloyd JH, Bruce M, Pantic N,  
290 Admassu T, James P, Warland A, Jordan M. Highly parallel direct RNA sequencing  
291 on an array of nanopores. *Nature methods*. 2018 Mar;15(3):201. DOI:  
292 10.1038/nmeth.4577

293

294 [17] Schaecher SR, Mackenzie JM, Pekosz A (2007). The ORF7b Protein of Severe  
295 Acute Respiratory Syndrome Coronavirus (SARS-CoV) Is Expressed in Virus-  
296 Infected Cells and Incorporated into SARS-CoV Particles. *Journal of Virology*, 81(2),  
297 718–731. DOI: 10.1128/JVI.01691-06

298

299 [18] Bojkova D, Klann K, Koch B, Widera M, Krause D, Ciesek S, Cinatl J, Münch C  
300 (2020) SARS-CoV-2 infected host cell proteomics reveal potential therapy targets.  
301 DOI: 10.21203/rs.3.rs-17218/v1

302

303 [19] Davidson AD, Williamson MK, Lewis S, Shoemark D, Carroll MW, Heesom K,  
304 Zambon M, Ellis J, Lewis PA, Hiscox JA, Matthews DA (2020) Characterisation of the  
305 transcriptome and proteome of SARS-CoV-2 using direct RNA sequencing and  
306 tandem mass spectrometry reveals evidence for a cell passage induced in-frame  
307 deletion in the spike glycoprotein that removes the furin-like cleavage site. DOI:  
308 10.1101/2020.03.22.002204

309

310 [20] He R, Dobie F, Ballantine M, Leeson A, Li Y, Bastien N, Cutts T, Andonov A, Cao J,  
311 Booth TF, Plummer FA, Tyler S, Baker L, Li X (2004) . Analysis of multimerization of  
312 the SARS coronavirus nucleocapsid protein. *Biochemical and Biophysical Research  
313 Communications*, 316(2), 476–483. DOI: 10.1016/j.bbrc.2004.02.074

314

315 [21] Goebel SJ, Hsue B, Dombrowski TF, Masters PS. Characterization of the RNA  
316 components of a putative molecular switch in the 3' untranslated region of the murine  
317 coronavirus genome. *J Virol*. 2004 Jan;78(2):669-82. DOI: 10.1128/jvi.78.2.669-  
318 682.2004

319

320 [22] Tengs T, Kristoffersen AB, Bachvaroff TR, Jonassen CM. A mobile genetic element  
321 with unknown function found in distantly related viruses. *Virol J*. 2013 Apr 25;10:132.  
322 DOI: 10.1186/1743-422X-10-132

323

324 [23] Rangan R, Zheludev IN, Das R. RNA genome conservation and secondary structure  
325 in SARS-CoV-2 and SARS-related viruses. bioRxiv preprint 2020 DOI:  
326 10.1101/2020.03.27.012906.

327

- 328 [24] Robertson MP, Igel H, Baertsch R, Haussler D, Ares M, Scott WG. The Structure of a  
329 Rigorously Conserved RNA Element within the SARS Virus Genome. *PLoS Biol.*  
330 2005 Jan; 3(1): e5. DOI: 10.1371/journal.pbio.0030005  
331
- 332 [25] Viehweger A, Krautwurst S, Lamkiewicz K, Madhugiri R, Ziebuhr J, Hölzer M, Marz  
333 M. Direct RNA nanopore sequencing of full-length coronavirus genomes provides  
334 novel insights into structural variants and enables modification analysis. *Genome*  
335 *research.* 2019 Sep 1;29(9):1545-54. DOI: 10.1101/gr.247064.118  
336
- 337 [26] Lichinchi G, Zhao BS, Wu Y, Lu Z, Qin Y, He C, Rana TM. Dynamics of human and  
338 viral RNA methylation during Zika virus infection. *Cell host & microbe.* 2016 Nov  
339 9;20(5):666-73. DOI: 10.1016/j.chom.2016.10.002  
340
- 341 [27] Denison MR, Graham RL, Donaldson EF, Eckerle LD, Baric RS. Coronaviruses: an  
342 RNA proofreading machine regulates replication fidelity and diversity. *RNA biology.*  
343 2011 Mar 1;8(2):270-9. DOI: 10.4161/rna.8.2.15013  
344
- 345 [28] Chinese SARS Molecular Epidemiology Consortium. Molecular evolution of the  
346 SARS coronavirus during the course of the SARS epidemic in China. *Science.* 2004  
347 Mar 12;303(5664):1666-9. DOI: 10.1126/science.1092002  
348
- 349 [29] Dudas G, Carvalho LM, Rambaut A, Bedford T. MERS-CoV spillover at the camel-  
350 human interface. *Elife.* 2018 Jan 16;7:e31257. DOI: 10.7554/eLife.31257  
351
- 352 [30] Cotten M, Watson SJ, Kellam P, Al-Rabeeh AA, Makhdoom HQ, Assiri A, Al-Tawfiq  
353 JA, Alhakeem RF, Madani H, AlRabiah FA, Al Hajjar S. Transmission and evolution  
354 of the Middle East respiratory syndrome coronavirus in Saudi Arabia: a descriptive  
355 genomic study. *The Lancet.* 2013 Dec 14;382(9909):1993-2002. DOI:  
356 10.1016/S0140-6736(13)61887-5  
357
- 358 [31] Andersen K. Clock and TMRCA based on 27 genomes. *Virological*, accessed on  
359 27/02/2020. <http://virological.org/t/clock-and-tmrca-based-on-27-genomes/347>  
360
- 361 [32] Bedford, T. Phylodynamic estimation of incidence and prevalence of novel  
362 coronavirus (nCoV) infections through time. *Virological*, accessed on 27/02/2020.

363 [http://virological.org/t/phylogenetic-estimation-of-incidence-and-prevalence-of-novel-  
365 coronavirus-ncov-infections-through-time/391](http://virological.org/t/phylogenetic-estimation-of-incidence-and-prevalence-of-novel-<br/>364 coronavirus-ncov-infections-through-time/391)

365

366

367 Acknowledgements

368

369 The authors gratefully acknowledge the traditional peoples of the land on which the work  
370 was carried out, the Wurundjeri Woi-wurrung people of the Kulin nation.

371

372 The authors also acknowledge the broader staff of the Victorian Infectious Disease  
373 Reference Laboratory (VIDRL), their public health partners, and VIDRL's major funder, the  
374 Victorian Department of Health and Human Services. The authors also thank David  
375 Matthews and Andrew Davidson of the University of Bristol for useful comments on the  
376 generated data, and Allison Hicks of Harvard T. H. Chan School of Public Health, for critical  
377 review of the manuscript. Lastly, the authors gratefully acknowledge the public health and  
378 academic groups contributing to the preparation, release and analysis of SARS-CoV-2  
379 sequence data, including Nextstrain, GISAID and Virological.

380

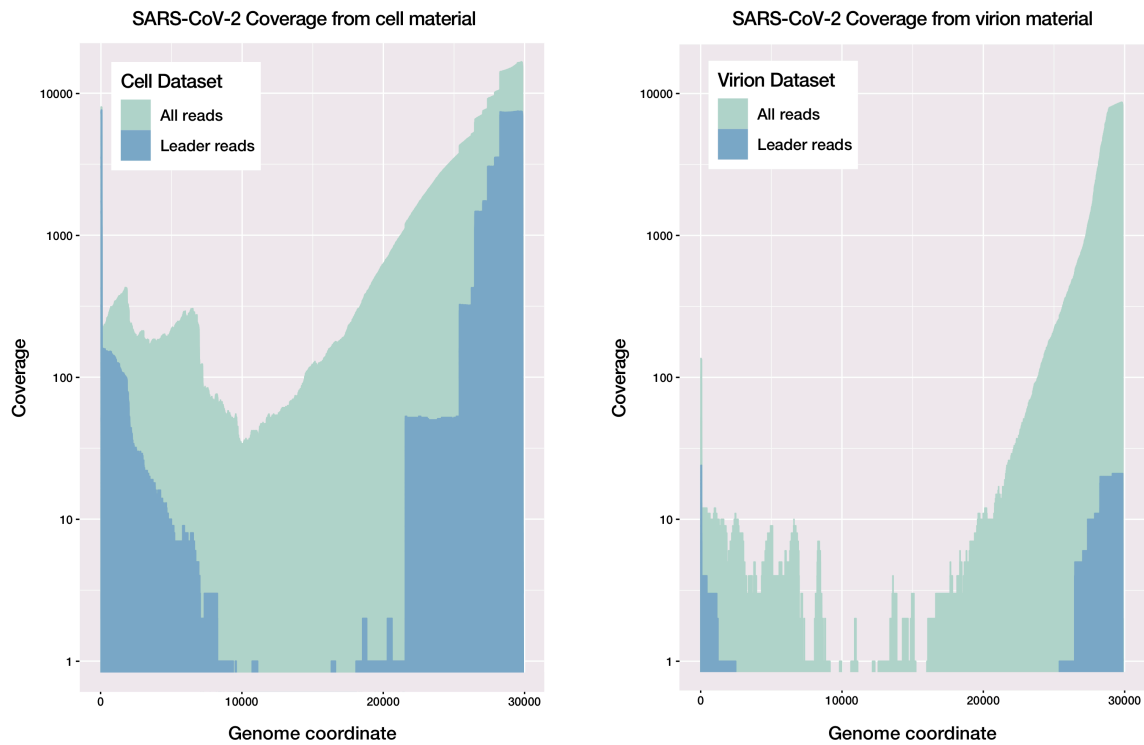

381

382 Supplementary Figure 1

383 Native RNA sequence coverage of the SARS-CoV-2 genome for cell-culture and virion-  
384 derived material. A) Coverage of the SARS-CoV-2 genome for the cell-culture dataset, for all  
385 reads and for those predicted to be intact mRNA transcripts or 'leader reads', showing an  
386 abundance of such transcripts. B) Coverage of the SARS-CoV-2 genome for the virion-  
387 derived dataset, showing a relative paucity of intact mRNA transcripts.

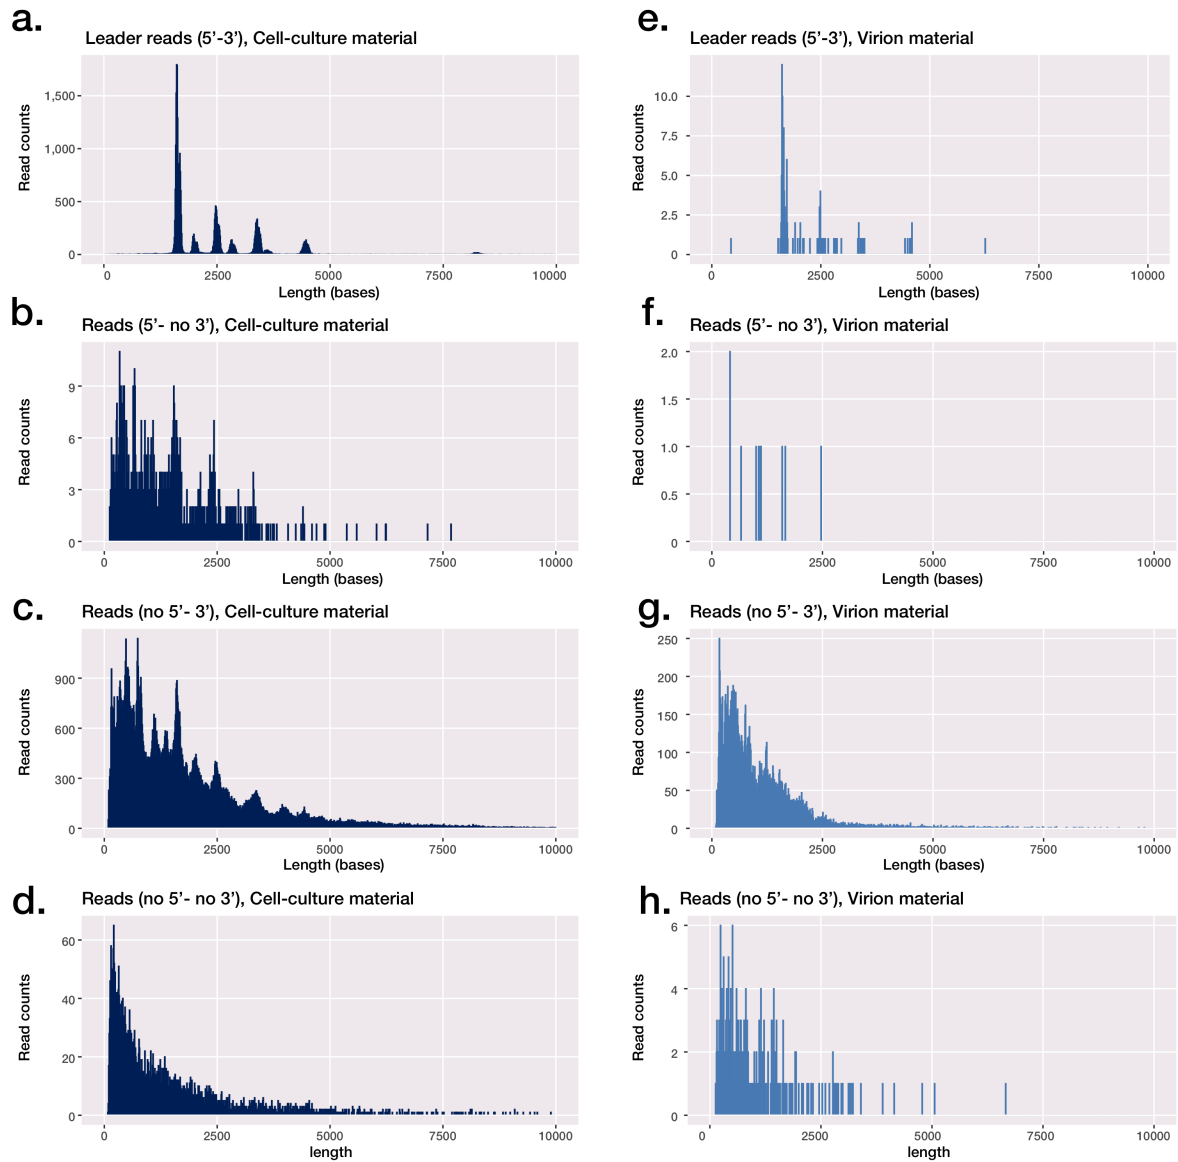

388

389 Supplementary Figure 2

390 Distribution of native RNA reads between intact transcripts ('leader reads') and other partial  
391 transcripts and genomic sequences. Intact transcripts include the leader sequence at the 5'  
392 and a polyadenylated 3' end (A and E, for cell-culture material and virion material  
393 respectively), while other partial transcripts or genomes either contain a leader sequence  
394 and lack an appropriate 3' sequence (B and F), vice versa (C and D), or lack both a leader  
395 sequence and an expected 3' end.

396



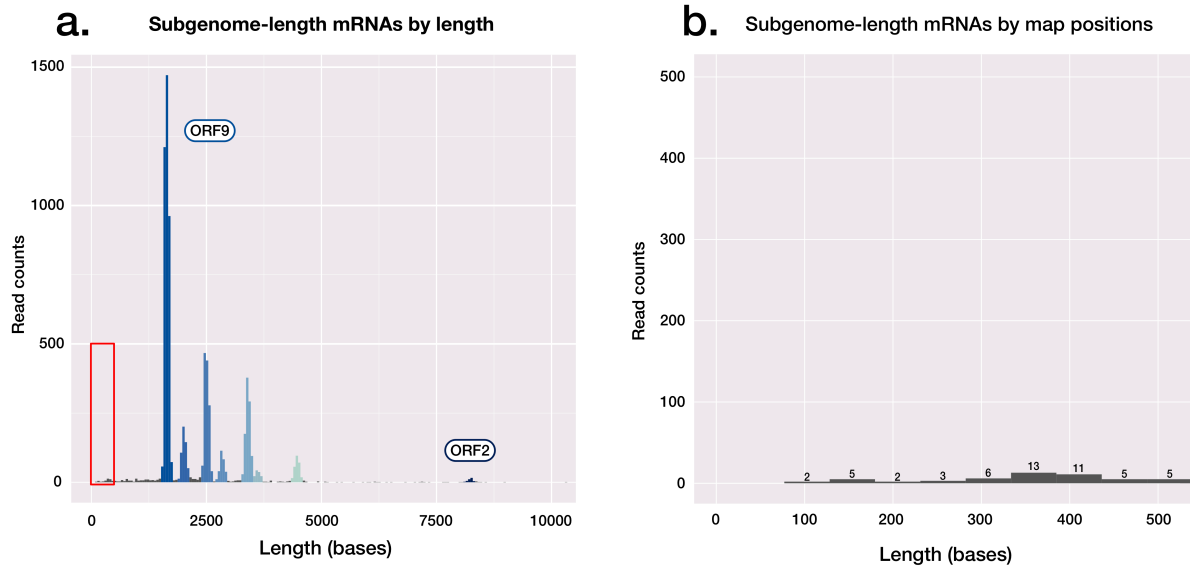

397

398 Supplementary Figure 3

399 Absence of observed coding potential for ORF10 in SARS-CoV-2. A) Read length

400 histogram, showing subgenomic mRNAs attributed to coding sequences, with the area

401 highlighted shown in detail in a second panel. B) Read length histogram, showing read

402 counts of lengths corresponding to those of the ORF10 subgenomic mRNA (~360 bases), if

403 present in the dataset. Of the <500 base reads shown, none align to ORF10.

**a.** Alignment of the SARS-CoV-2 3' UTR for selected isolates

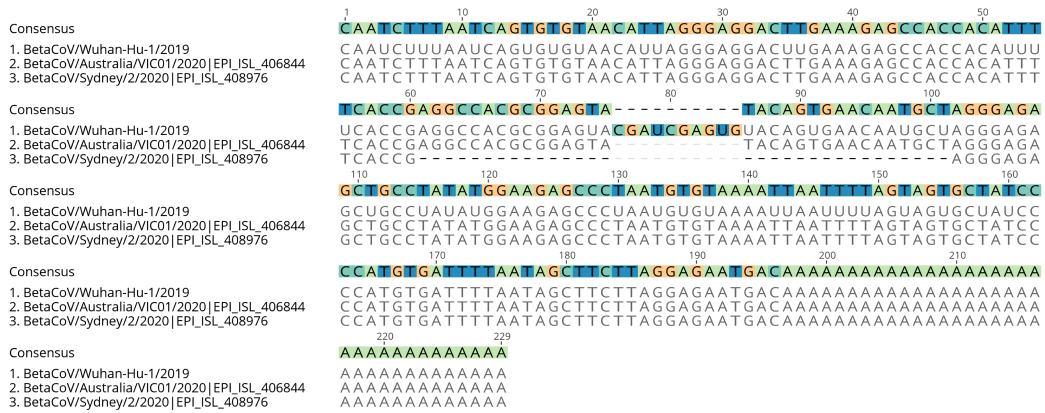

**b.** Schematic of predicted pseudoknots in the SARS-CoV-2 3' UTR affected by culture-derived deletions

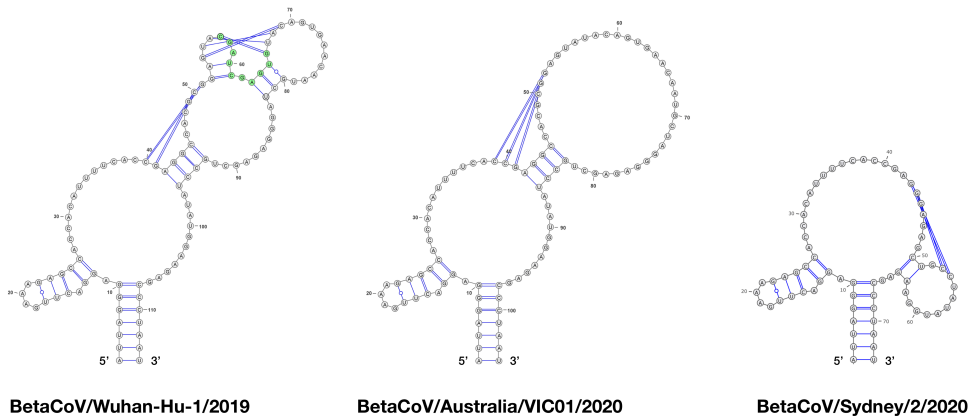

404

405 Supplementary Figure 4

406 Structured RNAs in the SARS-CoV-2 3' UTR. A) An alignment of SARS-CoV-2 3' UTR  
 407 sequences, including the original Wuhan-Hu-1 sourced from Wuhan, China and considered  
 408 the reference genome for the outbreak, and two examples of cultured SARS-CoV-2 isolates  
 409 exhibiting deletions in a shared 3' UTR region predicted to form a pseudoknot structure. B)  
 410 Predicted pseudoknot structure of the SARS-CoV-2 3'UTR affected by the above culture-  
 411 derived deletions.

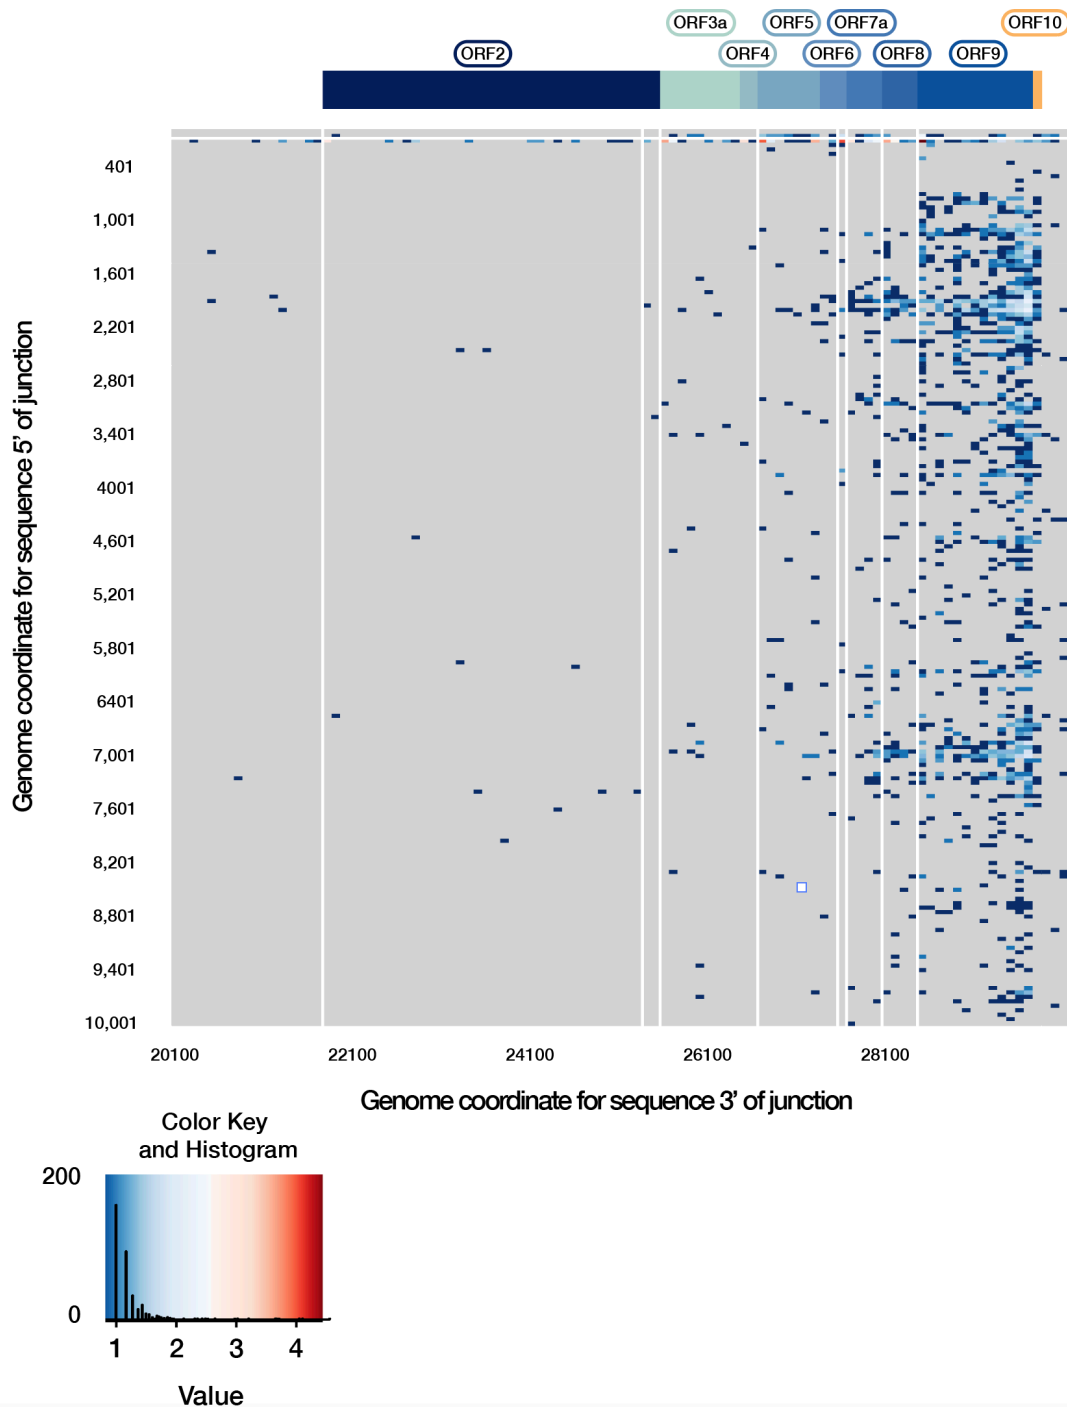

412

413 Supplementary Figure 5

414 Extended breakpoint analysis of the SARS-CoV-2 transcriptome. The genome coordinates  
415 3' of the breakpoint are extended to include potential 3' sequences positioned between 1-  
416 10,001 of the genome. This highlights low frequency breakpoints, increasing in frequency  
417 near the sequence annotated as ORF10 and the 3' end of the genome. The key shows the  
418 distribution of transcript breakpoints. Colour is matched to a 'value' measuring the number of  
419 reads with break points at that position, log<sub>10</sub>-scaled. The histogram component illustrates  
420 the number of transcripts with a given abundance value.

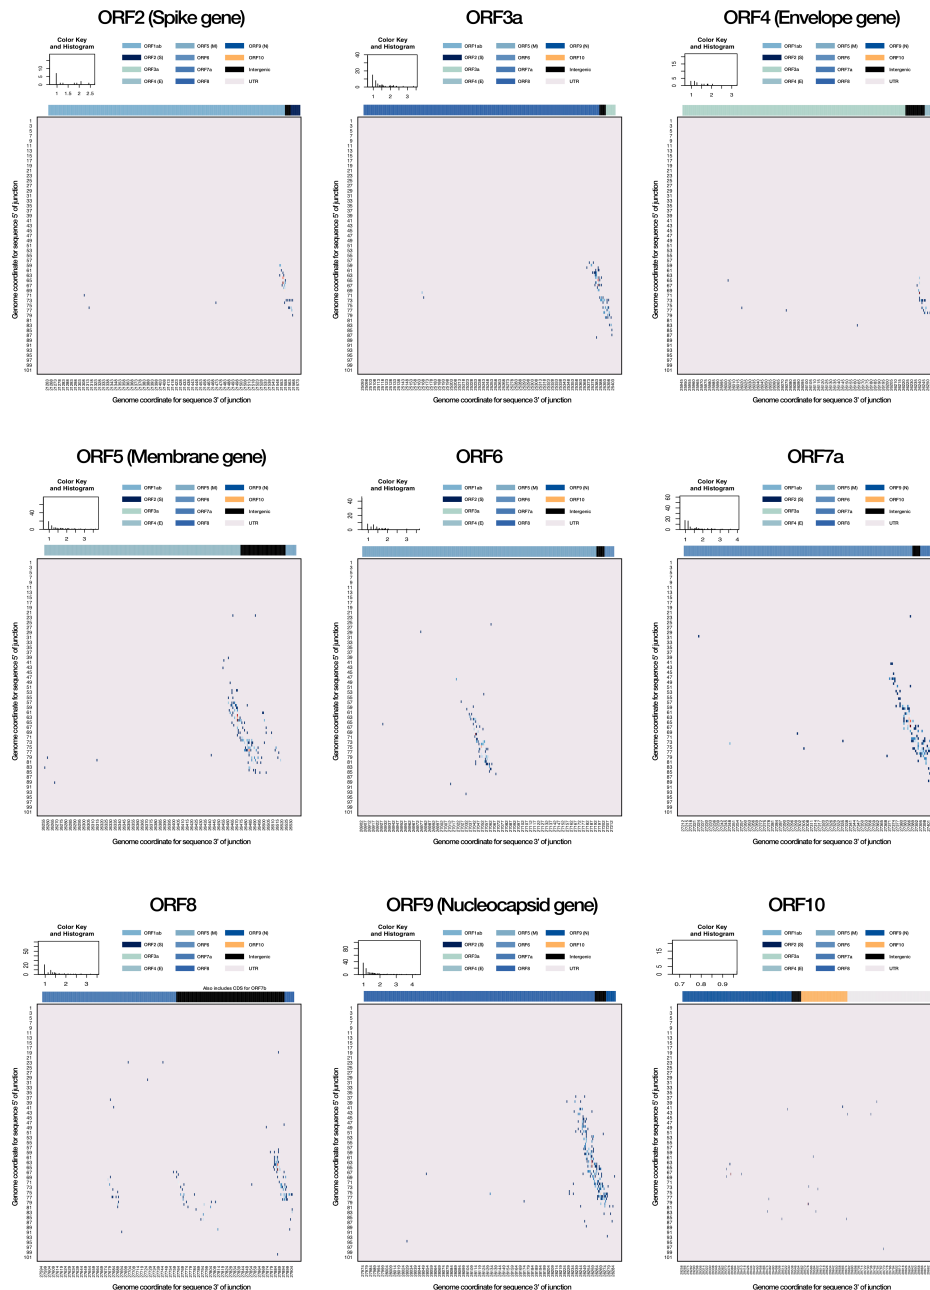

421

422 Supplementary Figure 6

423 ORF-specific breakpoint analyses. The corresponding breakpoints for each currently  
 424 annotated ORF in the SARS-CoV-2 genome are shown (A-I), highlighting a canonical  
 425 breakpoint for ORFs with a corresponding subgenome mRNA, and a low frequency of non-  
 426 canonical splice sites often centred on a canonical site. Of note, low frequency splice sites  
 427 can be seen for an area between ORF 7a and ORF8, likely corresponding to ORF7b (G).  
 428 There is an absence of splice sites for ORF in this dataset (I). The key shows the distribution  
 429 of transcript breakpoints. Colour is matched to a 'value' measuring the number of reads with  
 430 break points at that position, log<sub>10</sub>-scaled. The histogram component illustrates the number  
 431 of transcripts with a given abundance value.

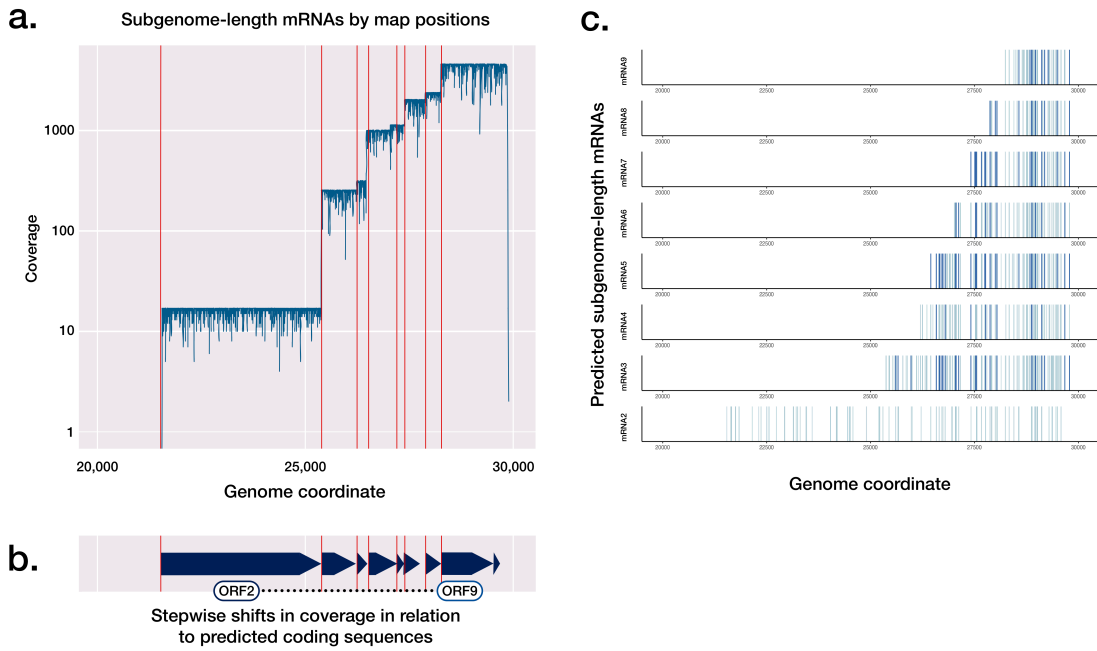

432

433 Supplementary Figure 7

434 Subgenomic mRNA abundance and predicted sites of modification. A) Coverage of relevant  
435 coding sequences achieved by alignment of subgenomic mRNAs to the SARS-CoV-2  
436 genome (log scale). Red lines indicate the first base of each coding sequence from ORF2-  
437 10. B) Schematic of relevant annotated coding sequences. C) Position of predicted m5C  
438 positions in subgenomic mRNAs. Dark blue lines indicate positions predicted to have >90%  
439 base modification; light blue lines indicate positions predicted to have between 50% and  
440 90% base modification.

441

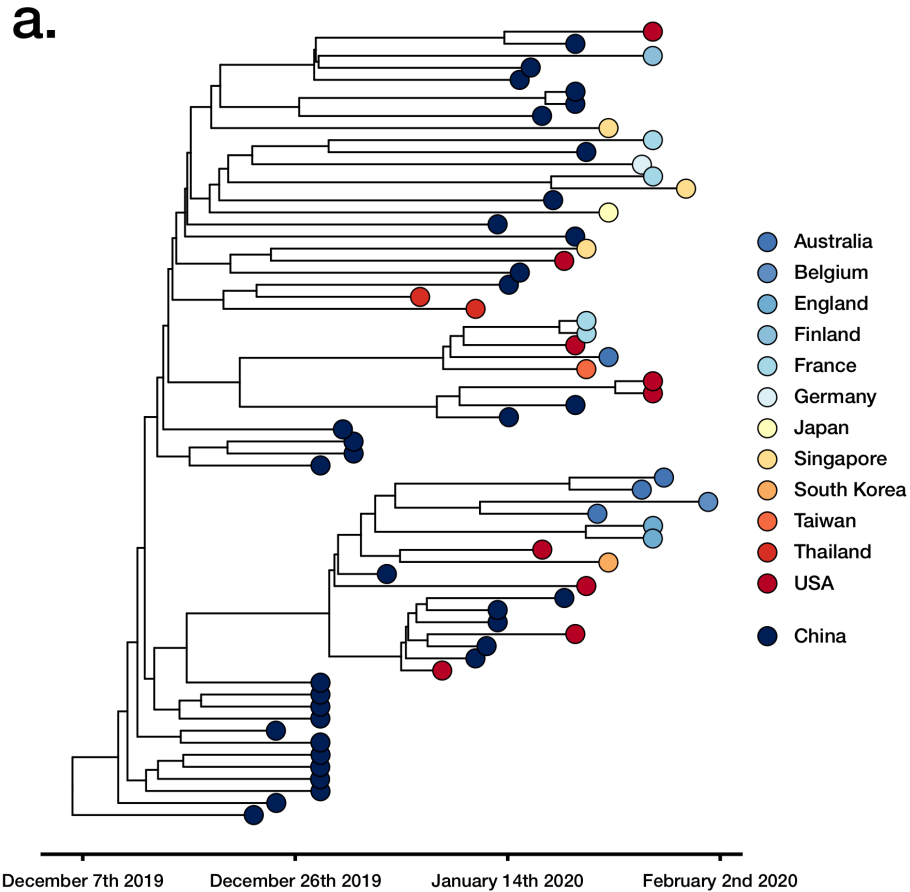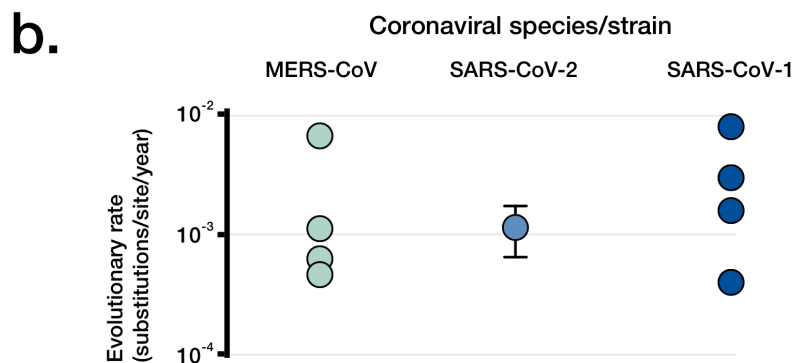

442

443 Supplementary Figure 8

444 Assessment of SARS-CoV-2 phylogenetics and viral evolutionary rate based on 66 early

445 genomes made publicly available. A) A timed highest clade-credibility phylogenetic tree of

446 curated SARS-CoV-2 66 genomes as inferred in BEAST. B) Comparison of the SARS-CoV-

447 2 rate estimate for the n=66 set and previously published estimates of other coronaviruses.



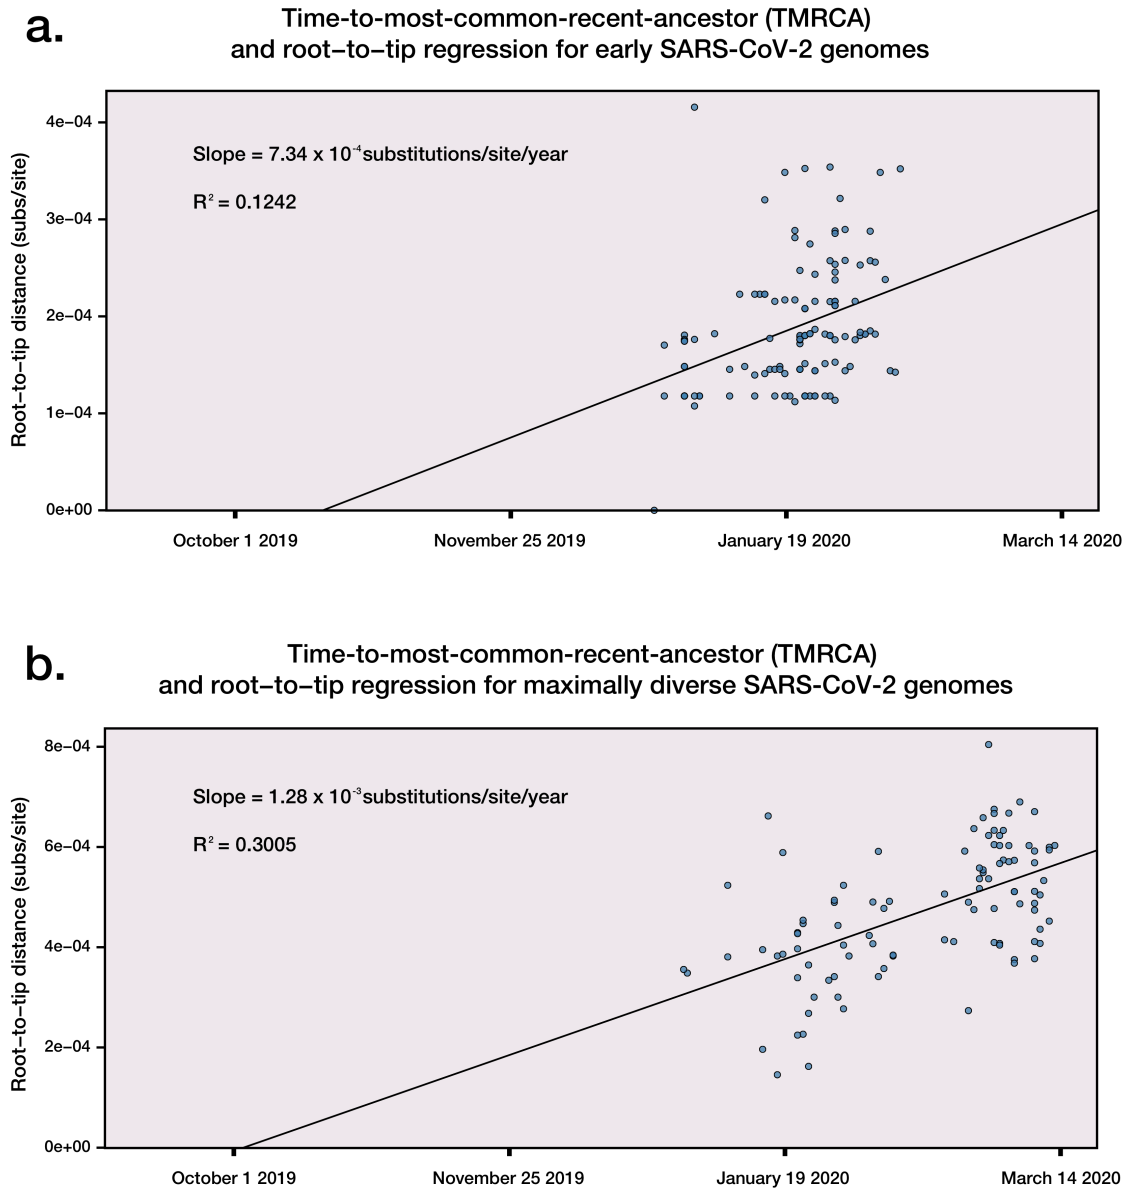

448

449 Supplementary Figure 9

450 Time-to-most-common-recent-ancestor (TMRCA) and root-to-tip regression of both early and

451 maximally diverse SARS-CoV-2 genome datasets. A) TMRCA and root-to-tip regression of

452 122 high quality complete SARS-CoV-2 genomes made available early in the pandemic.

453 B) TMRCA and root-to-tip regression of 100 maximally diverse SARS-CoV-2 genomes,

454 selected from the first 700 genomes made publicly available.

## Distribution of SARS-CoV-2 sampling times

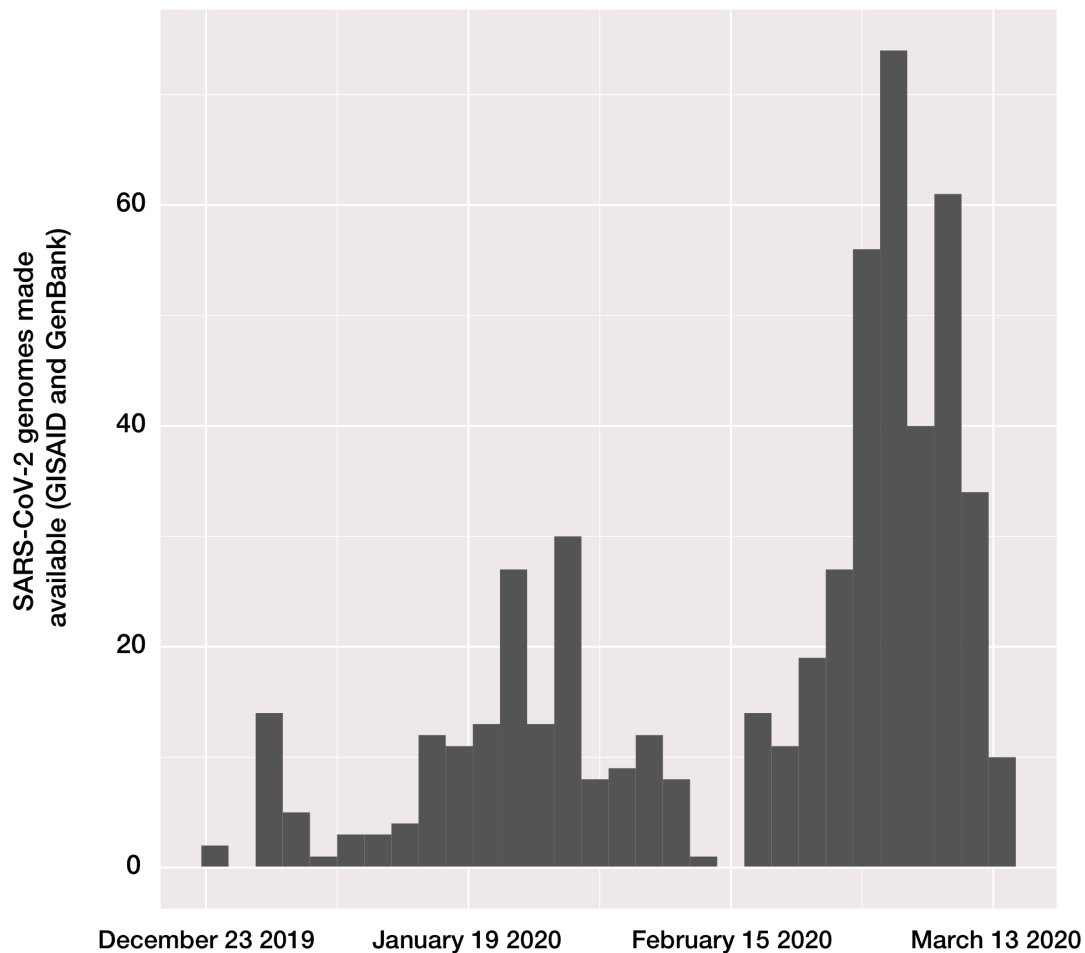

455

456 Supplementary Figure 10

457 Distribution of SARS-CoV-2 sampling times used to generate publicly available genomes.

458 The distribution has notable deviations from an expected exponential growth in the number  
459 of genomes available, such as in mid-February, with constant sampling being an underlying

460 assumption for many phylodynamic skyline approaches inferring effective population size.

461 Methods

462 Samples for direct RNA sequencing

463 The SARS-CoV-2 material was prepared from the first Australian case of COVID-2019  
464 (Australia/VIC01/2020), maintained in cell culture. In brief, African green monkey kidney  
465 cells expressing the human signalling lymphocytic activation molecule (SLAM; termed  
466 Vero/hSLAM cells accordingly) with associated SARS-CoV-2 infection were grown at 37°C  
467 at 5% CO<sub>2</sub> in media consisting of 10 mL Earle's minimum essential medium, 7% FBS  
468 (Bovogen Biologicals, Keilor East, Aus), 2 mM L-Glutamine, 1 mM Sodium pyruvate, 1500  
469 mg/L sodium bicarbonate, 15 mM HEPES and 0.4 mg/ml geneticin in 25cm<sup>2</sup> flasks. This  
470 isolate is to the best of our knowledge typical for SARS-CoV-2 isolates, with the genome of  
471 the cultured isolate (MT007544.1) having three single nucleotide variants (T19065C,  
472 T22303G, G26144T) relative to the SARS-CoV-2 Wuhan-Hu-1 reference genome  
473 (MN908947.3), and a 10 base deletion in the 3' UTR. Both the T22303G and 3' UTR  
474 variants have been confirmed as culture-derived through Sanger sequencing of clinical and  
475 culture material, and do not appear in the earlier virion-derived data.

476

477 Nucleic acids were prepared from clarified cell-free supernatant (reflecting virion material)  
478 and infected cell culture material (representing actively transcribed and translated viral  
479 material), following inactivation with linear acrylamide and ethanol. RNA was extracted from  
480 100µl of supernatant and a modest pellet for the cell-culture material (~200mg) respectively,  
481 using manually prepared wide-bore pipette tips and minimal steps to maintain RNA length  
482 for long read sequencing, and a QIAamp Viral RNA Mini Kit (Qiagen, Hilden, Germany).  
483 Carrier RNA was not added to Buffer AVL, with 1% linear acrylamide (Life Technologies,  
484 Carlsbad, CA, USA) added instead. Wash buffer AW1 was omitted from the purification  
485 stage, with RNA eluted in 50 µl of nuclease free water, followed by DNase treatment with  
486 Turbo DNase (Thermo Fisher Scientific, Waltham, MA, USA) 37°C for 30 min. RNA was  
487 cleaned and concentrated to 10 µl using the RNA Clean & Concentrator-5 kit (Zymo  
488 Research, Irvine, CA, USA), as per manufacturer's instructions.

489

490 Nanopore sequencing of direct RNA

491 Prepared RNA (~1µg) was carried into a direct RNA sequence library preparation with the  
492 Oxford Nanopore DRS protocol (SQK- RNA002, Oxford Nanopore Technologies) following  
493 the manufacturer's specifications, with addition of the control RNA in the virion sample.  
494 Libraries were loaded on R9.4 flow cells and sequenced on a GridION device for the cell-  
495 derived material and a MinION device for the virion-derived material (Oxford Nanopore

496 Technologies), and sequenced for 40 hours. Signal-space data was used to generate  
497 nucleobase sequences ('basecalled') using Guppy, either as a standalone program or as  
498 ont-guppy-for-gridion 3.0.6. Both signal-space and basecalled read data are available at  
499 BioProject PRJNA608224. It should be noted that non-polyadenylated RNAs are not  
500 expected to be detected with this approach.

501

502 Characterisation of SARS-CoV-2 transcriptome architecture

503 Direct RNA reads passing the above given quality thresholds were aligned to the genome of  
504 the cultured Australian SARS-COV-2 isolate (MT007544.1), with parallel and concordant  
505 analyses in Geneious Prime (2019.2.1, [M1]) and minimap2 v 2.11 using the "spliced" preset  
506 [M2]. Coverage statistics were determined from the resulting read alignments. To identify  
507 complete subgenomic mRNAs, reads were aligned to a 62 base SARS-COV-2 leader  
508 sequence (5'ACCUUCCCAGGUAACAAACCAACCAACUUUCGAUCUCUUGUAGAU  
509 CUGUUCUCUAAACGAAC), with reads aligning to the leader sequence being pooled and  
510 visualized in a length histogram. Significant peaks were identified visually and confirmed  
511 with a smoothed z-score algorithm. Reads captured in this binning-by-length strategy were  
512 re-aligned to the reference genome using the above methods and visualized in Tablet [M3].  
513 Subgenome bins were refined to remove reads which did not originate at the 3' poly-A tail as  
514 expected for intact subgenomic mRNAs, or which had leader sequences at least 10bp  
515 longer than expected. Subgenome bins were re-aligned, with coverage calculated in  
516 SAMtools [M4], and plotted using ggplot2 [M5] in R [M6]. Breakpoints in mRNAs were  
517 determined with CIGAR string manipulation; any given spliced region longer than 100bp  
518 (represented by Ns in the CIGAR string after aligning with minimap2) was regarded as a  
519 spliced transcript and the 5' and 3' genome co-ordinates of the breakpoint were recorded for  
520 analysis. The IPKnot webserver [M7] was used to predict the RNA secondary structures,  
521 and the VARNA visualization applet [M8] to produce schematics.

522

523 As an alternate method of defining the SARS-CoV-2 transcriptome, reads carrying a  
524 breakpoint relative to the 5' leader sequence are shown, representing potentially viable  
525 transcripts. This was determined through CIGAR string manipulation. Any spliced region  
526 longer than 100bp (represented by Ns in the CIGAR string after aligning with minimap2) was  
527 regarded as a spliced transcript and the 5' and 3' genome co-ordinates of the breakpoint  
528 were recorded for analysis. Locations of Transcription Regulating Sequence in the body of  
529 the genome (TRS-B) were determined with a Position Weight Matrix (PWM) search. Portions  
530 of reads aligning to the conserved TRS in the leader sequence (TRS-L) were transformed

531 into a count matrix, which was then passed into the FIMO program version 5.5.1 for motif  
532 detection with NRDB as the background distribution [M9]. Detected TRS-B sites are plotted  
533 alongside breakpoint heatmaps.

534

#### 535 Data availability

536 All signal-space (fast5) and basecalled data (fastq) generated in this work are publicly  
537 available on the sequence read archive (SRA), as part of the BioProject PRJNA608224 (See  
538 Supplementary Table 6 for relevant accession numbers).

539

#### 540 Identification of 5mC methylation

541 Nanopore sequencing preserves *in vivo* base modifications and enables their detection from  
542 raw voltage signal information. In brief, the signal-space fast5 files corresponding to  
543 identified subgenomic mRNAs were assessed to identify signal changes corresponding to  
544 5mC methylation. These were first retrieved using the fast5\_fetcher\_multi function in  
545 SquiggleKit [M10]. Reads were processed to align raw signal with basecalled sequence data  
546 using Tombo v1.5 [<https://github.com/nanoporetech/tombo>]. Canonical reference sequences  
547 were made for each subgenomic mRNAs, with the binned fast5 files input into the  
548 detect\_modifications function, with 5mC as the alternate-model parameter. Outputs were  
549 converted to dampened\_fraction wiggle files and exported for visualization and analysis.

550

#### 551 Assessment of publicly available proteomes

552 Proteomic datasets were downloaded from the PRIDE proteomic database [M11] (Pride  
553 accession: PXD017710) and processed using Maxquant (1.6.3.4 [M12]) allowing semi-  
554 specific free-N-terminus tryptic as a protease specificity. Quantitation was set to TMT11 plex  
555 labelling and human proteome (Uniprot: UP000005640) and SARS-CoV2 (build in house)  
556 databases were used. Additional searches were made of the SARS-CoV reference  
557 proteome (Proteome ID: UP000000354), and recently available SARS-CoV-2 proteomic  
558 data [19].

559

#### 560 SARS-CoV-2 Phylogenetics

561 In order to estimate the evolutionary rate and time of origin of SARS-CoV-2, we carried out  
562 phylogenetic analyses in BEAST v1.101 [M13] on three datasets. The first dataset included  
563 66 high quality genomes available up to February 10th 2020, the second consisted of 122  
564 available up to February 24th 2020, both from GISAID and GenBank (Supplementary Table  
565 3). A third maximal diversity dataset (n=100) was included to demonstrate the utility of

566 capturing varying degrees of genetic diversity, these genomes being selected from the first  
567 700 genomes available on GISAID and maximised phylogenetic diversity achieved using  
568 Treemer [M14] (Supplementary Table 4). Temporal signal was assessed using BETS [M15].  
569 Initially we determined whether the evolutionary signal and time over which the genome data  
570 were collected was sufficient to calibrate the molecular clock, allowing for the evolutionary  
571 rate and timescale of the outbreak to be inferred. The model selection approach from BETS  
572 supported a strict molecular clock model with genome sampling times for calibration and a  
573 coalescent exponential tree prior, which posits that the number of infected individuals grows  
574 exponentially over time. We used the HKY+ $\Gamma$  substitution model, and set the following priors  
575 for key parameters:

- 576 • A continuous time Markov chain for the evolutionary rate
- 577 • A Laplace distribution with mean of 0 and scale of 100 for the growth rate
- 578 • An exponential distribution with mean of 1 for the effective population size.

579 A Markov chain Monte Carlo of length  $10^7$  was set, sampling every  $10^3$  steps, and assessed  
580 sufficient sampling by verifying that the effective sample size for all parameters was at least  
581 200 as determined in Tracer [M16], automatically discarding 10% of the burn in. We  
582 summarised the posterior distribution of phylogenetic trees by selecting the highest clade  
583 credibility tree alongside calculating posterior node probabilities and the distribution of node  
584 ages. Comparison to other coronaviral evolutionary rates included studies [M17-24].

585  
586 A root-to-tip regression usually produces lower evolutionary rate estimates than explicit  
587 phylogenetic methods [M25], although is commonly used to inspect temporal signal in the  
588 data. In our analyses, the data set that maximised phylogenetic diversity had a higher  $R^2$   
589 than that with 122 samples collected earlier, and an evolutionary rate that was more similar  
590 to that obtained in BEAST. Although, both data sets had temporal signal according to BETS,  
591 the root-to-tip regressions demonstrate that including more genetic diversity can produce  
592 improved estimates, probably because stochastic variation has a stronger impact in smaller  
593 data sets that are collected early in the outbreak.

594  
595 [M1] Kearse M, Moir R, Wilson A, Stones-Havas S, Cheung M, Sturrock S, Buxton S,  
596 Cooper A, Markowitz S, Duran C, Thierer T. Geneious Basic: an integrated and  
597 extendable desktop software platform for the organization and analysis of sequence  
598 data. *Bioinformatics*. 2012 Jun 15;28(12):1647-9.

599



- 600 [M2] Li H. Minimap2: pairwise alignment for nucleotide sequences. *Bioinformatics*. 2018  
601 Sep 15;34(18):3094-100.  
602
- 603 [M3] Milne I, Bayer M, Stephen G, Cardle L, Marshall D. Tablet: visualizing next-  
604 generation sequence assemblies and mappings. *Bioinformatics*. 2016 (pp. 253-268).  
605 Humana Press, New York, NY.  
606
- 607 [M4] Li H, Handsaker B, Wysoker A, Fennell T, Ruan J, Homer N, Marth G, Abecasis G,  
608 Durbin R. The sequence alignment/map format and SAMtools. *Bioinformatics*. 2009  
609 Aug 15;25(16):2078-9.  
610
- 611 [M5] Wickham H. ggplot2: elegant graphics for data analysis. Springer; 2016 Jun 8  
612
- 613 [M6] R Core Team (2018). R: A language and environment for statistical computing. R  
614 Foundation for Statistical Computing, Vienna, Austria.  
615
- 616 [M7] Sato, Kengo, et al. "IPknot: fast and accurate prediction of RNA secondary structures  
617 with pseudoknots using integer programming." *Bioinformatics*. 2011 27.13: i85-i93.  
618
- 619 [M8] Darty, Kévin, Alain Denise, and Yann Ponty. "VARNA: Interactive drawing and  
620 editing of the RNA secondary structure." *Bioinformatics* 2009 25.15: 1974.  
621
- 622 [M9] Grant CE, Bailey TL, Noble WS. FIMO: scanning for occurrences of a given motif.  
623 *Bioinformatics* 2011 27: 1017-1018  
624
- 625 [M10] Vizcaino JA, Csordas A, del-Toro N, Dianes JA, Griss J, Lavidas I, et al. Update of  
626 the PRIDE database and its related tools. *Nucleic Acids Res*. 2016;44(D1):D447-56.  
627
- 628 [M11] Cox J, Mann M. MaxQuant enables high peptide identification rates, individualized  
629 p.p.b.-range mass accuracies and proteome-wide protein quantification. *Nat*  
630 *Biotechnol*. 2008;26(12):1367-72. DOI: 10.1038/nbt.1511.  
631
- 632 [M12] Ferguson JM, Smith MA. SquiggleKit: A toolkit for manipulating nanopore signal  
633 data. *Bioinformatics*. 2019 Dec 15;35(24):5372-3.  
634

- 635 [M13] Drummond AJ, Rambaut A. BEAST: Bayesian evolutionary analysis by sampling  
636 trees. *BMC evolutionary biology*. 2007 Dec;7(1):214.  
637
- 638 [M14] Menardo F, Loiseau C, Brites D, Coscolla M, Gygli SM, Rutaihwa LK, Trauner A,  
639 Beisel C, Borrell S, Gagneux S. Treemmer: a tool to reduce large phylogenetic  
640 datasets with minimal loss of diversity. *BMC Bioinformatics* 2018 19(1), 164. DOI:  
641 10.1186/s12859-018-2164-8  
642
- 643 [M15] Duchene S, Stadler T, Ho SY, Duchene DA, Dhanasekaran V, Baele G. Bayesian  
644 Evaluation of Temporal Signal in Measurably Evolving Populations. *bioRxiv*. 2019  
645 Jan 1:810697.  
646
- 647 [M16] Rambaut A, Drummond AJ, Xie D, Baele G, Suchard MA. Posterior summarization in  
648 Bayesian phylogenetics using Tracer 1.7. *Systematic biology*. 2018 Sep;67(5):901.  
649
- 650 [M17] Cotten M, Watson SJ, Kellam P, Al-Rabeeah AA, Makhdoom HQ, Assiri A, Al-Tawfiq  
651 JA, Alhakeem RF, Madani H, AlRabiah FA, Al Hajjar S. Transmission and evolution  
652 of the Middle East respiratory syndrome coronavirus in Saudi Arabia: a descriptive  
653 genomic study. *The Lancet*. 2013 Dec 14;382(9909):1993-2002.  
654
- 655 [M18] Cotten M, Watson SJ, Zumla AI, Makhdoom HQ, Palser AL, Ong SH, Al Rabeeah  
656 AA, Alhakeem RF, Assiri A, Al-Tawfiq JA, Albarrak A. Spread, circulation, and  
657 evolution of the Middle East respiratory syndrome coronavirus. *MBio*. 2014 Feb  
658 28;5(1):e01062-13.  
659
- 660 [M19] Dudas G, Carvalho LM, Rambaut A, Bedford T. MERS-CoV spillover at the camel-  
661 human interface. *Elife*. 2018 Jan 16;7:e31257.  
662
- 663 [M20] Zhao Z, Li H, Wu X, Zhong Y, Zhang K, Zhang YP, Boerwinkle E, Fu YX. Moderate  
664 mutation rate in the SARS coronavirus genome and its implications. *BMC*  
665 *evolutionary biology*. 2004 Dec 1;4(1):21.  
666
- 667 [M21] Salemi M, Fitch WM, Ciccozzi M, Ruiz-Alvarez MJ, Rezza G, Lewis MJ. Severe  
668 acute respiratory syndrome coronavirus sequence characteristics and evolutionary

- 669 rate estimate from maximum likelihood analysis. *Journal of virology*. 2004 Feb  
670 1;78(3):1602-3.  
671
- 672 [M22] Wu SF, Du CJ, Wan P, Chen TG, Li JQ, Li D, Zeng YJ, Zhu YP, He FC. The genome  
673 comparison of SARS-CoV and other coronaviruses. *Yi chuan= Hereditas*. 2003  
674 Jul;25(4):373-82.  
675
- 676 [M23] Chinese SARS Molecular Epidemiology Consortium. Molecular evolution of the  
677 SARS coronavirus during the course of the SARS epidemic in China. *Science*. 2004  
678 Mar 12;303(5664):1666-9.  
679
- 680 [M24] Sanjuán R. From molecular genetics to phylodynamics: evolutionary relevance of  
681 mutation rates across viruses. *PLoS pathogens*. 2012 May;8(5).  
682
- 683 [M25] Duchêne S, Geoghegan JL, Holmes EC, Ho SY. Estimating evolutionary rates using  
684 time-structured data: a general comparison of phylogenetic methods. *Bioinformatics*.  
685 2016 32(22), 3375-3379.
